# Supplementary material for: The impact of anthropogenic inputs on lithium content in river and tap water
Source: PubMed Central journal article supplement (PMC6890772; doi:10.1038/s41467-019-13376-y), 2019-12-03
Supplement: 41467_2019_13376_MOESM1_ESM.pdf [file 41467_2019_13376_MOESM1_ESM.pdf]

Supplementary Information for

**The impact of anthropogenic inputs on lithium content in river and tap water**

by Choi *et al.*

## Supplementary Figures

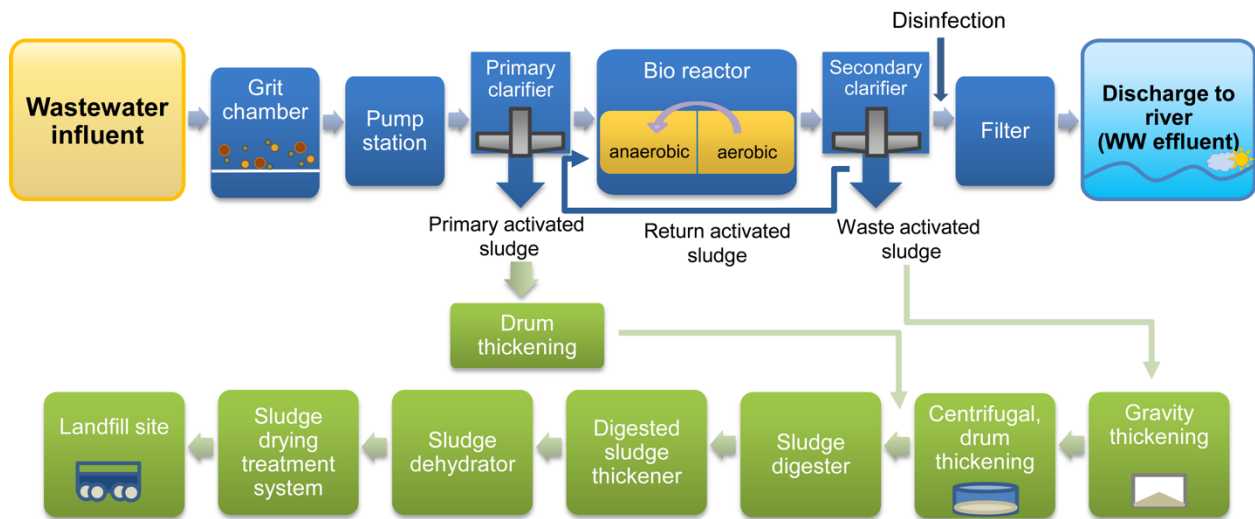

**Supplementary Figure 1.** Schematic diagram showing the wastewater (WW) treatment processes, and the relationship between treated waters (WW effluent) and the Han River in Seoul (modified from Seoul Tancheon Water Reclamation Centers; <http://www.tancheon.com/kr/>). Grit chamber removes solid phases in wastewater. Primary clarifier removes the pollutants by gravity during 3 hours. Bioreactor decomposes nutrients and organic matter. Secondary clarifier removes organic matter by gravity.

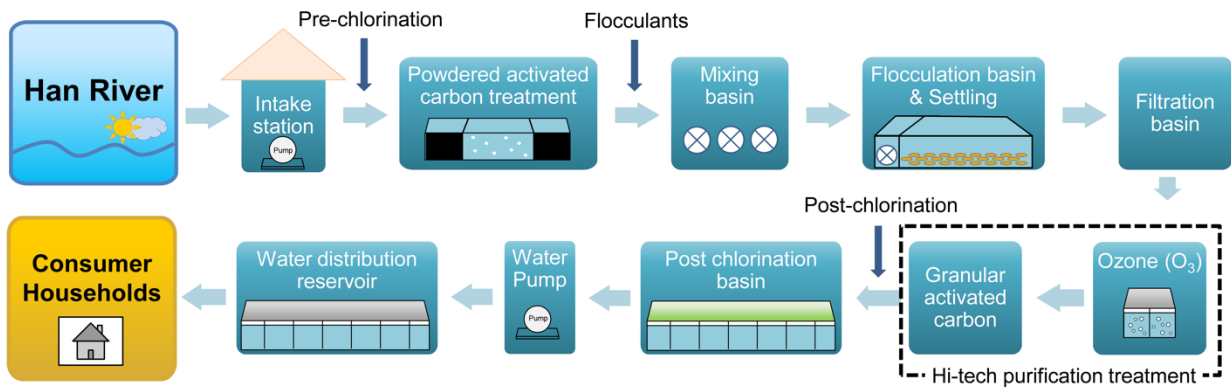

**Supplementary Figure 2.** Schematic diagram showing the tap water purification processes from water extracted from the Han River reservoir downstream the Paldang Dam (modified from the Office of Waterworks Seoul Metropolitan Government; <https://arisu.seoul.go.kr/index.jsp>).

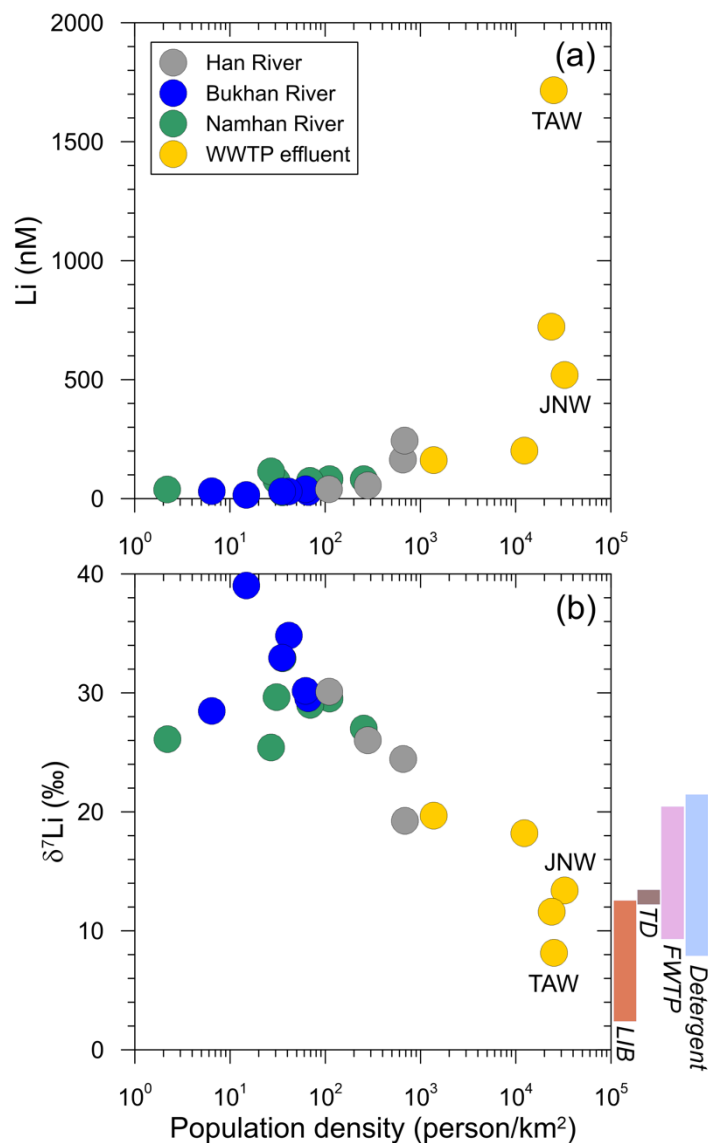

**Supplementary Figure 3.** Lithium concentrations (a) and Li isotope compositions (b) in river waters and wastewaters, as a function of the population density. LIB, TD and FWTP represent secondary Li-ion battery, therapeutic drug and food waste treatment plant, respectively. The low  $\delta^7\text{Li}$  values measured in the wastewater (yellow circle) are compatible with those of the anthropogenic sources, and particularly the Li-rich materials (LIB and TD) (see text and Supplementary Table 5). Wastewater effluent coming from the “TAW” WWTP is strongly enriched in Li compared to the others. The high Li content associated to low  $\delta^7\text{Li}$  value is likely due to the food waste treatment plant located closely.

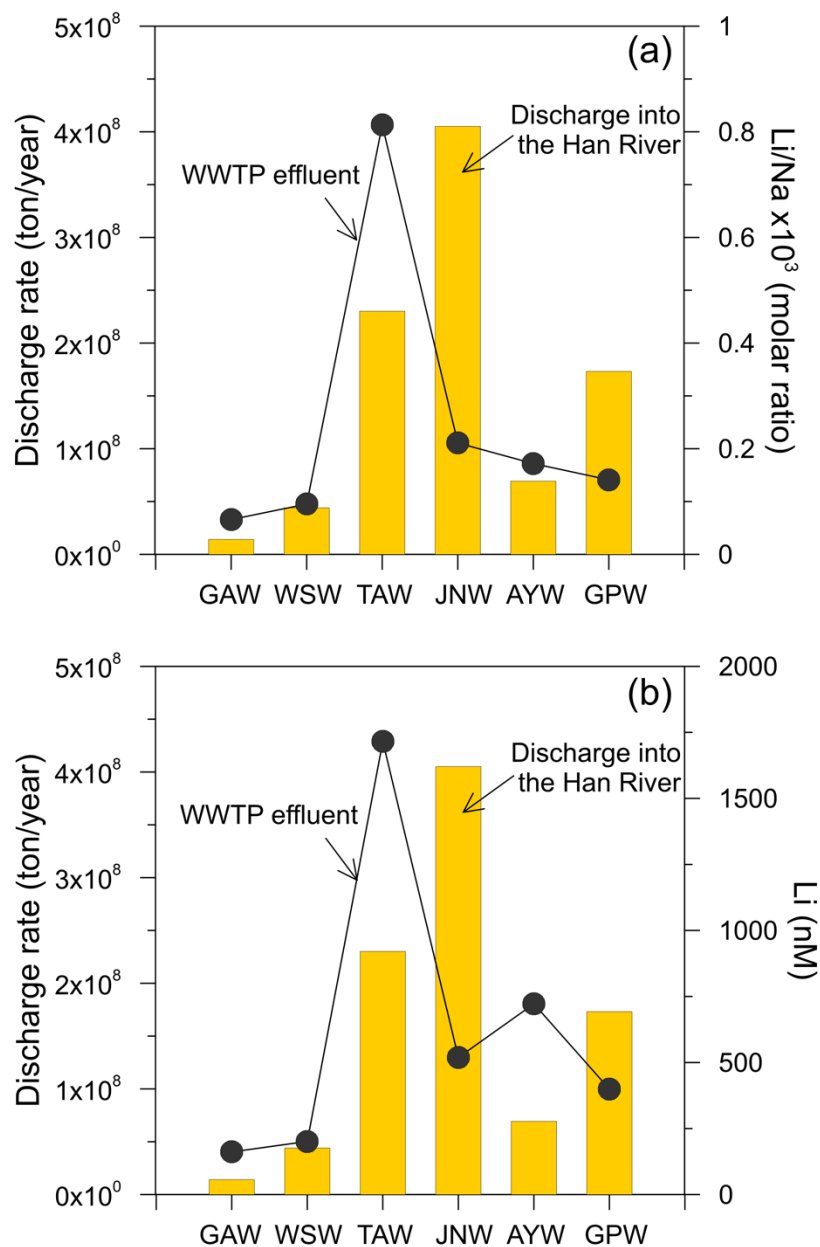

**Supplementary Figure 4.** Relationship between the discharge rate of WWTP (yellow bar) and Li/Na ratio (a), and Li concentration (b) in the WW effluent. The highest Li content and Li/Na ratio are measured for the “TAW” WWTP and is best explained by the Li-rich wastewaters coming from the only food waste treatment plant of Seoul (Fig. 1B). Indeed, we have shown that the food wastewater contains high Li content ( $2.90 \pm 0.45 \mu\text{M}$ ,  $1\sigma$ ,  $n=2$ ; Supplementary Table 3). The discharge rate of TAW is much lower than that of JNW, explaining the discrepancy with the population density observed for these samples (Supplementary Figure 3).

## Supplementary Tables

### Supplementary Table 1

Geographical information of the Han River Basin<sup>a</sup>.

| Sample                   | Land use <sup>b</sup> |                   |       |              |       |      |                     | Population <sup>c</sup><br>(person) |
|--------------------------|-----------------------|-------------------|-------|--------------|-------|------|---------------------|-------------------------------------|
|                          | Forest                | Agricultural area | River | Resident (%) | Field | Golf | Industrial district |                                     |
| <i>Han River (HR)</i>    |                       |                   |       |              |       |      |                     |                                     |
| HR1                      | 79.8                  | 13.6              | 2.5   | 2.5          | 1.2   | 0.2  | 0.3                 | 2,063,811                           |
| HR2                      | 76.7                  | 13.3              | 2.5   | 3.1          | 1.2   | 0.2  | 3.1                 | 5,458,771                           |
| HR3                      | 77.6                  | 13.4              | 2.6   | 4.6          | 1.3   | 0.2  | 0.4                 | 13,216,728                          |
| HR4                      | 77.3                  | 13.4              | 2.6   | 4.8          | 1.3   | 0.2  | 0.4                 | 13,915,532                          |
| <i>Bukhan River (BR)</i> |                       |                   |       |              |       |      |                     |                                     |
| BR1                      | 86.2                  | 8.2               | 2.8   | 2.0          | 0.8   | 0.0  | 0.1                 | 469,793                             |
| BR2                      | 87.4                  | 6.7               | 3.1   | 2.0          | 0.7   | 0.0  | 0.0                 | 339,494                             |
| BR3                      | 90.1                  | 5.2               | 2.8   | 1.1          | 0.8   | 0.0  | 0.0                 | 41,682                              |
| BR4                      | 84.9                  | 12.1              | 1.1   | 1.3          | 0.6   | 0.0  | 0.0                 | 35,928                              |
| BR5                      | 88.5                  | 5.8               | 3.1   | 2.0          | 0.5   | 0.0  | 0.0                 | 33,830                              |
| BR6                      | 90.0                  | 5.8               | 1.0   | 1.6          | 1.5   | 0.0  | 0.0                 | 13,372                              |
| <i>Namhan River (NR)</i> |                       |                   |       |              |       |      |                     |                                     |
| NR1                      | 76.3                  | 17.2              | 2.2   | 2.5          | 1.4   | 0.2  | 0.2                 | 1,182,930                           |
| NR2                      | 75.1                  | 17.6              | 1.4   | 3.9          | 1.4   | 0.4  | 0.3                 | 328,185                             |
| NR3                      | 80.1                  | 14.4              | 2.0   | 1.9          | 1.3   | 0.1  | 0.1                 | 539,388                             |
| NR4                      | 84.6                  | 11.8              | 1.1   | 1.2          | 1.3   | 0.1  | 0.1                 | 148,762                             |
| NR5                      | 86.5                  | 10.0              | 1.0   | 1.1          | 1.3   | 0.1  | 0.0                 | 68,086                              |
| NR6                      | 81.4                  | 14.7              | 1.2   | 1.3          | 1.2   | 0.1  | 0.1                 | 55,302                              |
| NR7                      | 97.0                  | 1.2               | 0.8   | 0.9          | 0.1   | 0.0  | 0.0                 | 75                                  |

<sup>a</sup> data from a ArcGIS 10 (Esri, Redlands, CA, USA)

<sup>b</sup> Land use data from Environmental geographic information service, EGIS (<https://egis.me.go.kr>)

<sup>c</sup> Population data from biz-gis ([www.biz-gis.com](http://www.biz-gis.com))

**Supplementary Table 2**

Elemental and Li isotope geochemistry of river water samples.

| Sample                   | T<br>(°C) | pH  | EC<br>(μS/cm) | Ca  | Mg   | Na  | K    | Si   | Sr<br>(μM) | Cl   | SO <sub>4</sub> | HCO <sub>3</sub> <sup>a</sup> | NO <sub>3</sub> | CBE <sup>b</sup><br>(%) | Li<br>(nM) | δ <sup>7</sup> Li<br>(‰) |
|--------------------------|-----------|-----|---------------|-----|------|-----|------|------|------------|------|-----------------|-------------------------------|-----------------|-------------------------|------------|--------------------------|
| <i>Han River (HR)</i>    |           |     |               |     |      |     |      |      |            |      |                 |                               |                 |                         |            |                          |
| HR1                      | 25.1      | 7.1 | 135           | 357 | 116  | 285 | 58.1 | 92.7 | 0.90       | 276  | 98.0            | 657                           | 137             | 0.9                     | 39.6       | 30.1                     |
| HR2                      | 25.8      | 7.4 | 152           | 391 | 131  | 351 | 65.1 | 81.5 | 1.00       | 336  | 111             | 739                           | 130             | 1.2                     | 55.7       | 26.0                     |
| HR3                      | 26.9      | 7.2 | 181           | 455 | 149  | 443 | 81.8 | 76.9 | 1.08       | 439  | 130             | 860                           | 141             | 0.9                     | 164        | 24.4                     |
| HR4                      | 26.4      | 7.0 | 243           | 523 | 162  | 725 | 137  | 92.3 | 1.22       | 703  | 146             | 934                           | 245             | 1.3                     | 244        | 19.2                     |
| <i>Bukhan River (BR)</i> |           |     |               |     |      |     |      |      |            |      |                 |                               |                 |                         |            |                          |
| BR1                      | 23.6      | 7.0 | 96.8          | 258 | 70.0 | 199 | 37.4 | 173  | 0.68       | 166  | 78.5            | 351                           | 197             | 1.2                     | 27.8       | 29.5                     |
| BR2                      | 23.6      | 7.7 | 178           | 553 | 159  | 346 | 61.2 | 153  | 1.25       | 325  | 97.8            | 867                           | 201             | 7.1                     | 40.0       | 30.2                     |
| BR3                      | 18.4      | 7.4 | 100           | 293 | 82.4 | 198 | 35.2 | 94.6 | 0.83       | 160  | 81.3            | 470                           | 135             | 3.0                     | 15.9       | 39.0                     |
| BR4                      | 21.3      | 7.5 | 144           | 405 | 125  | 257 | 50.9 | 178  | 1.26       | 281  | 95.1            | 507                           | 337             | 2.0                     | 30.2       | 34.8                     |
| BR5                      | 27.4      | 8.1 | 105           | 315 | 110  | 184 | 37.6 | 51.4 | 0.71       | 142  | 63.4            | 617                           | 93.8            | 4.4                     | 29.9       | 32.9                     |
| BR6                      | 20.4      | 7.5 | 76.0          | 170 | 57.9 | 177 | 24.8 | 157  | 0.53       | 166  | 48.9            | 271                           | 116             | 0.6                     | 31.0       | 28.5                     |
| <i>Namhan River (NR)</i> |           |     |               |     |      |     |      |      |            |      |                 |                               |                 |                         |            |                          |
| NR1                      | 29.1      | 7.6 | 189           | 475 | 138  | 439 | 95.7 | 138  | 1.33       | 431  | 148             | 844                           | 161             | 0.9                     | 81.3       | 29.5                     |
| NR2                      | 24.9      | 7.6 | 179           | 509 | 122  | 407 | 77.9 | 173  | 1.48       | 415  | 106             | 834                           | 222             | 1.9                     | 81.6       | 27.0                     |
| NR3                      | 26.2      | 7.5 | 188           | 542 | 173  | 414 | 88.7 | 137  | 1.18       | 397  | 130             | 1031                          | 104             | 3.8                     | 74.9       | 29.0                     |
| NR4                      | 26.1      | 8.1 | 250           | 900 | 261  | 217 | 39.9 | 115  | 1.64       | 285  | 167             | 1593                          | 224             | 2.8                     | 75.2       | 29.6                     |
| NR5                      | 25.5      | 8.2 | 254           | 974 | 242  | 202 | 32.0 | 87.5 | 2.22       | 292  | 212             | 1671                          | 184             | 1.8                     | 114        | 25.4                     |
| NR6                      | 25.7      | 8.0 | 241           | 803 | 276  | 259 | 48.1 | 137  | 1.18       | 356  | 128             | 1476                          | 283             | 1.9                     | 26.7       | 32.9                     |
| NR7                      | 20.4      | 7.6 | 44.2          | 114 | 38.9 | 111 | 17.2 | 129  | 0.24       | 64.1 | 35.1            | 197                           | 99.2            | 0.3                     | 37.7       | 26.1                     |

<sup>a</sup> HCO<sub>3</sub> ≈ Total alkalinity<sup>b</sup> Charge Balance Error (CBE) = (TZ<sup>+</sup>-TZ<sup>-</sup>)/(TZ<sup>+</sup>+TZ<sup>-</sup>)×100

**Supplementary Table 3**

Elemental and Li isotope geochemistry of wastewaters from the Seoul treatment plants (WWTP).

| Sample <sup>a</sup>     | Drainage area <sup>b</sup>          | Population <sup>b</sup> | Population density <sup>c</sup> | Discharge rate <sup>b</sup> | T    | pH  | EC      | Ca    | Mg   | Na   | K    | Sr   | Cl   | SO <sub>4</sub> | HCO <sub>3</sub> <sup>d</sup> | NO <sub>3</sub> | Li   | δ <sup>7</sup> Li | 1σ <sub>m</sub> <sup>e</sup> | n |
|-------------------------|-------------------------------------|-------------------------|---------------------------------|-----------------------------|------|-----|---------|-------|------|------|------|------|------|-----------------|-------------------------------|-----------------|------|-------------------|------------------------------|---|
|                         | km <sup>2</sup>                     | (×10 <sup>3</sup> )     | (person/km <sup>2</sup> )       | (×10 <sup>6</sup> ton/year) | (°C) |     | (μS/cm) |       |      |      |      | (μM) |      |                 |                               |                 | (nM) | (‰)               |                              |   |
| <i>Influent of WWTP</i> |                                     |                         |                                 |                             |      |     |         |       |      |      |      |      |      |                 |                               |                 |      |                   |                              |   |
| GAW-I                   | 32                                  | 44                      | 1,375                           | 14.1                        | 24.1 | 7.2 | 648     | 920   | 300  | 1990 | 340  | 1.71 | 1930 | 390             | 3530                          | n.d.            | 124  | 21.7              | -                            | - |
| WSW-I                   | 27                                  | 337                     | 12,325                          | 44.1                        | 25.7 | 7.2 | 623     | 880   | 270  | 2350 | 350  | 1.51 | 2160 | 360             | 2980                          | n.d.            | 214  | 19.4              | -                            | - |
| TAW-I                   | 71                                  | 1,776                   | 25,185                          | 230                         | 26.7 | 7.1 | 739     | 820   | 350  | 2780 | 420  | 1.54 | 2600 | 300             | 3610                          | n.d.            | 1586 | 7.7               | -                            | - |
| JNW-I                   | 112                                 | 3,641                   | 32,580                          | 405                         | 26.8 | 7.1 | 690     | 750   | 250  | 2640 | 400  | 1.40 | 2170 | 310             | 3570                          | n.d.            | 585  | 13.8              | -                            | - |
| AYW-I                   | 43                                  | 1,014                   | 23,753                          | 69.4                        | 28.3 | 7.1 | 982     | 1140  | 370  | 4780 | 450  | 1.83 | 4330 | 840             | 3330                          | n.d.            | 948  | 10.1              | -                            | - |
| <i>Effluent of WWTP</i> |                                     |                         |                                 |                             |      |     |         |       |      |      |      |      |      |                 |                               |                 |      |                   |                              |   |
| GAW-E                   | 32                                  | 44                      | 1,375                           | 14.1                        | 26.1 | 7.2 | 548     | 930   | 300  | 2450 | 400  | 1.48 | 2130 | 610             | 1350                          | 390             | 162  | 19.7              | -                            | - |
| WSW-E                   | 27                                  | 337                     | 12,325                          | 44.1                        | 26.3 | 6.6 | 471     | 800   | 220  | 2110 | 330  | 1.36 | 1870 | 410             | 900                           | 740             | 201  | 18.2              | -                            | - |
| TAW-E                   | 71                                  | 1,776                   | 25,185                          | 230                         | 27.8 | 6.6 | 505     | 820   | 250  | 2110 | 390  | 1.51 | 2060 | 320             | 1240                          | 700             | 1716 | 8.1               | -                            | - |
| JNW-E                   | 112                                 | 3,641                   | 32,580                          | 405                         | 26.9 | 7.2 | 745     | 770   | 280  | 2460 | 480  | 1.31 | 2140 | 280             | 4150                          | n.d.            | 519  | 13.4              | -                            | - |
| AYW-E                   | 43                                  | 1,014                   | 23,753                          | 69.4                        | 26.2 | 7.0 | 788     | 1040  | 340  | 4200 | 460  | 1.53 | 4030 | 740             | 1600                          | 340             | 722  | 11.6              | -                            | - |
| GPW-E                   | 60                                  | 1,701                   | 28,373                          | 173                         | 27.8 | 6.7 | 596     | 910   | 280  | 2830 | 380  | 1.30 | 2460 | 570             | 1270                          | 650             | 399  | 16.1              | -                            | - |
|                         | Primary activated sludge (PAS)      |                         |                                 |                             |      |     |         | 12221 | 3093 | 2138 | 4982 | 45.0 | -    | -               | -                             | -               | 7.80 | -0.4              | 0.6                          | 2 |
|                         | Waste activated sludge (WAS)        |                         |                                 |                             |      |     |         | 6547  | 2950 | 1518 | 3820 | 83.6 | -    | -               | -                             | -               | 6.15 | -0.3              | 0.3                          | 2 |
| WWTP <sup>f</sup>       | Sludge from drying treatment system |                         |                                 |                             |      |     |         | 14413 | 5227 | 1942 | 4942 | 107  | -    | -               | -                             | -               | 7.85 | 1.7               | 0.0                          | 2 |
|                         | Supernatant fluid from PAS          |                         |                                 |                             |      |     |         | 95.4  | 21.2 | 61.0 | 33.7 | 0.49 | -    | -               | -                             | -               | 0.01 | 8.1               | 0.3                          | 2 |
|                         | Supernatant fluid from WAS          |                         |                                 |                             |      |     |         | 25.7  | 15.1 | 56.0 | 37.3 | 0.09 | -    | -               | -                             | -               | 0.01 | 12.8              | 0.3                          | 2 |

n.d.: not detected

<sup>a</sup> GAW: Gyeongang, WSW: Wangsuk, TAW: Tan, JNW: Jungnang, AYW: Anyang, and GPW: Gulpo

<sup>b</sup> data from the Ministry of Environment (<http://eng.me.go.kr>)

<sup>c</sup> calculated as dividing population by drainage area

<sup>d</sup> HCO<sub>3</sub> ≈ Total alkalinity

<sup>e</sup> standard error

<sup>f</sup> see Supplementary Figure 1 and the text for more details; Concentration units in ppm (d.w.)



**Supplementary Table 4**

Li isotope geochemistry of Seoul tap water samples.

| Sample | Li   | $\delta^7\text{Li}$ |
|--------|------|---------------------|
|        | nM   | (‰)                 |
| T1     | 40.8 | 26.9                |
| T2     | 50.4 | 25.3                |
| T3     | 55.1 | 23.7                |
| T4     | 103  | 23.3                |

**Supplementary Table 5**

Elemental and Li isotope geochemistry of Li-rich materials in this study.

| Sample                            | Ca                                           | Mg     | Na    | K       | Sr    | Li   | $\delta^7\text{Li}$ | $1\sigma_m^a$ | n   |   |
|-----------------------------------|----------------------------------------------|--------|-------|---------|-------|------|---------------------|---------------|-----|---|
|                                   | (ppm d.w.)                                   |        |       |         |       |      | (‰)                 |               |     |   |
| Therapeutic drug (TD)             | Lithium carbonate from Myung In Pharm        | 15.0   | 367   | 1,569   | 92.7  | 0.02 | 108,743             | 12.2          | 0.1 | 4 |
|                                   | Lithium carbonate from Whan In Pharm         | 906    | 394   | 608     | 124   | 1.35 | 100,734             | 13.3          | 0.3 | 2 |
| Food waste treatment plant (FWTP) | Compost                                      | 24,957 | 1,256 | 8,080   | 8,423 | 65.5 | 0.39                | 9.3           | -   | 1 |
|                                   | Wastewater before treatment                  | 1,087  | 184   | 2,416   | 2,122 | 3.44 | 0.02                | 18.3          | 0.5 | 2 |
|                                   | Wastewater after treatment                   | 903    | 162   | 6,818   | 1,854 | 2.82 | 0.02                | 20.4          | -   | 1 |
| Secondary Li-ion Battery (LIB)    | LiFePO <sub>4</sub> (Commercial, China)      | 147    | n.d.  | 2,286   | 903   | 5.43 | 40,592              | 8.5           | 0.0 | 2 |
|                                   | LiFePO <sub>4</sub> /NC <sup>b</sup> (Korea) | 106    | n.d.  | 108     | 175   | 0.83 | 45,823              | 2.4           | 0.0 | 2 |
|                                   | LiFePO <sub>4</sub> /C (Korea)               | 14.2   | n.d.  | 57.3    | 52.6  | 0.13 | 74,425              | 3.1           | 0.1 | 2 |
|                                   | LiCoO <sub>2</sub> (Commercial, Korea)       | 123    | 2,640 | 127     | 50.3  | 4.50 | 76,129              | 12.6          | 0.0 | 2 |
| Detergent                         | SuperTie                                     | 18,022 | 900   | 216,069 | 1,304 | 15.0 | 1.39                | 8.0           | 0.5 | 2 |
|                                   | TECH                                         | 26,845 | 1,484 | 280,105 | 334   | 22.1 | 2.92                | 18.8          | 0.7 | 2 |
|                                   | BEAT                                         | 16,208 | 1,639 | 261,328 | 385   | 11.7 | 0.53                | 13.2          | 0.2 | 2 |
|                                   | Spark                                        | 15,909 | 844   | 272,990 | 372   | 11.4 | 1.38                | 21.4          | 0.9 | 3 |

n.d.: not detected

<sup>a</sup> standard error<sup>b</sup> NC: Nitrogen-doped Carbon

## Supplementary Note

The geology of the Han River (HR) basin consists of Precambrian gneiss, Mesozoic granites, and Paleozoic carbonates<sup>1-3</sup>. The Bukhan River (BR) drains Precambrian gneiss and Mesozoic granites, while the upper Namhan River (NR) flows through Paleozoic carbonates/clastic sediments and then the lower NR drains Precambrian gneiss and Mesozoic silicates. Neither salt-bearing rocks nor evaporates occur in the HR basin<sup>4</sup>. The land occupation of the HR basin is mainly forested (46.2%), followed by residential and business areas (33.8%) and agricultural lands (11.1%) (Supplementary Table 1). The mean annual temperature is 13.1°C, ranging from 8.1°C in the winter to 18.7°C in the summer<sup>5</sup>. The mean precipitation is 1450 mm/year, of which approximately two-thirds occurs between June and September<sup>5</sup>.

## Supplementary References

1. Ryu, J.-S., Lee, K.-S. & Chang, H.-W. Hydrogeochemical and isotopic investigations of the Han River basin, South Korea. *J Hydrol.* **345**, 50-60 (2007).
2. Ryu, J.-S., Lee, K.-S., Chang, H.-W. & Shin, H. S. Chemical weathering of carbonates and silicates in the Han River basin, South Korea. *Chem. Geol.* **247**, 66-80 (2008).
3. Ryu, J.-S., Lee, K.-S., Chang, H.-W. & Cheong, C-S. Uranium isotopes as a tracer of sources of dissolved solutes in the Han River, South Korea. *Chem. Geol.* **258**, 354-361 (2009).
4. Chough, S. K., Kwon, S. T., Ree, J. H. & Choi, D. K. Tectonic and sedimentary evolution of the Korean peninsula: a review and new view. *Earth-Sci. Rev.* **52**, 175–235 (2000).
5. KMA, 2017. Annual Climatological Report. Korea Meteorological Administration.
