# Supplementary material for: The impact of anthropogenic inputs on lithium content in river and tap water
Source: PubMed Central journal article supplement (PMC6890772; doi:10.1038/s41467-019-13376-y), 2019-12-03
Supplement: 41467_2019_13376_MOESM2_ESM.pdf [file 41467_2019_13376_MOESM2_ESM.pdf]

Reviewers' comments:

Reviewer #1 (Remarks to the Author):

Choi and co-workers present a study on Li concentration and isotopic composition in the larger Seoul watershed. They document rather interesting trends: Li concentrations increase as the Han River crosses Seoul and Li isotopic composition becomes enriched in the lighter isotopes. The authors identify waste water treatment plants as likely sources, and show that Li isotopes in technological Li applications, i.e. batteries, correspond to the anthropogenic Li isotope end-member.

The study is rather elegant in its simplicity, and pertinent in terms of the environmental awareness that it raises. Results are not overstated, the methods are detailed and of high quality. Since I am not an expert on lithium, I have spent an hour or so on the web of science to see what studies exist on Li pollution. I confirm the author's statements in the introduction, which is 'not much'. This would be the first environmental application of Li pollution tracing using Li isotopes. I therefore think it would of interest to the broader environmental chemistry and biogeochemistry community. And I therefore recommend publication in Nature Communications.

Jeroen Sonke, Toulouse, May 2019

Minor comments:

L17 "Our study therefore unravels the need to perform a lithium survey..."

One can unravel some complex problem....but not a need. Suggest to write 'Our study highlights the need for a lithium survey at the global scale...'

L29 and 34. 'Few studies have been published....toxic', and 'Li isotopes are widely used by earth scientist...'

Few vs widely....each phrase has 5 citations. Suggest to delete 'widely'.

L39. « Determining the conditions under which its concentration or its isotope signature can be artificially biased becomes a challenge. »

What is meant by artificially biased? Anthropogenically impacted?

Not clear in Fig 2 caption what the smaller, half-transparent green and blue circles represent?

L91. "...Li isotope compositions are high and constant..."

It is not the isotope composition that is high....it is the the  $d7Li$  parameter (or  $7/6Li$  ratio) that is high.

If space permits I would suggest to move Figure 1 to the main text. It is very convincing in terms of binary mixing.

Reviewer #2 (Remarks to the Author):

The aim of this manuscript is to study and quantify the amount of Li in the Han River basin (Korea) that is sourced from industrial anthropogenic activities. The production and usage of Li has significantly increased over the past two decades owing to both the electronic revolution and energy transition. Despite recognition of this, few studies have investigated the source and fate of anthropogenic-derived lithium in urban environments. In this study, the authors have combined Li concentration and isotope measurements in river water, tap water and wastewater treatment plant samples with geographical and geological information. They found that the concentration of Li in the

Han River increases by a factor of 6 when crossing the city of Seoul, and this increase is accompanied with a decrease of the dissolved Li isotope composition. Because the Li-batteries have low Li isotope composition and the Li concentration and isotope composition of river samples is correlated with the population density, they suggest that "anthropogenic activities related to the number of inhabitants are responsible for the changes displayed by the Han River" (lines 98-99), through the disposal of Li-batteries.

I think that the purpose of this study is novel, timely and of interest to a wide range of people and scientific communities. The dataset coverage is good and the observed trends are quite spectacular. Clearly, as justified by the authors, there is a major input of anthropogenic Li into the Han River when it crosses the city of Seoul and this has major implications for environmental policies. However, I find that some aspects of the discussion about the origin, characterization and control of this anthropogenic source(s) of Li are problematic and not very clear. For this reason, I suggest that this manuscript could be considered for publication in Nature communication providing major revisions are carried out. Below, I detail my main criticisms of the manuscript.

The authors suggest that the high Li content is related to the high population density (title of the paper, Lines 98-99, correlation with population density Fig. 4) through the release of Li from Li-batteries due to the absence of disposal process guidelines for waste batteries (Line 111), but they do not provide or explicitly discuss a causal mechanism. How is the Li transferred from the battery into the river? (this is not discussed at all in the manuscript). Why would the population density control the Li release? Is it because of widespread disposal of used Li-batteries by inhabitants? (i.e. each inhabitant has electronics with Li-battery so the more inhabitants, the more disposal of used batteries, the more contamination of the water due to the leaking of disposed Li batteries?). The authors need to discuss or clarify these aspects.

Secondly, similarly to Li, the concentrations of most of the major anions and cations are significantly increasing downstream. What processes or input sources are responsible for this concentration increase? Since these elements are not present (or in very low amounts) in Li batteries, it shows that there are possibly other sources of dissolved ions to the river. Could these sources potentially account for some of the observed increase Li concentration? It is possible to partly answer this question by normalizing the Li concentrations (e.g. to Cl or Na). When Li concentrations are normalized, it appears that only the wastewater effluent "TAW" (and not the others effluents) is a significant source of Li relative to other elements and relative to the upstream non-impacted tributaries. Clearly, there is a specific local source of Li only in that part of the city (corresponding to TAW), and this input explains most of the observed Li concentration increase downstream. This lead to my third criticism of the discussion: I find the correlation between the Li concentration and the population density (Fig. 4a) misleading. The highest Li concentration (by far) and Li/Cl (or Li/Na) ratio do not correspond to the area with the highest population density (WWTP effluent "TAW", Fig. 4). The anthropogenic input of Li to the river is local and not widespread, and does not correspond to the zone of highest population density. In my opinion, this contradicts the title of the manuscript, and gives some indications about the source of this anthropogenic Li. Is there something specific in this area relative to other areas of the city that could potentially explain the observed high Li content? I understand that it is beyond the scope of this study to precisely characterize all the potential source of anthropogenic Li in urban environments, and the authors mention several possible sources of Li. Nevertheless, I think that data interpretation could be expanded with the above suggestions. As a final general comment, Seoul is close to the estuary, could the tide have an influence on the river chemistry?

Below are more specific comments:

- Line 1: the title is problematic as the highest source of Li is not where the population density is the highest
- Lines 57-59: what is the "drainage" area covered by these wastewater treatment plants and how is the population density calculated for these samples (Fig. 4).
- Line 136: I think Figure S1 should be in the main text instead of Figure 3.

Reviewer #3 (Remarks to the Author):

The manuscript presents concentration and isotope ratio data for Li from surface, waste, and tap water from around a major city. The goal is to begin to understand the scope of Li contamination in municipal waters. Lithium is an element frequently not quantified in surface and drinking waters, so there is something of a gap in our knowledge of the baseline of Li in these waters.

I think the idea is an interesting one and one which merits investigation by the geochemical community. From that standpoint, I think the manuscript has a certain value to a Nature audience. Although the health impacts of dissolved Li are far from clear, most studies do not signal immense concern for Li toxicity in general. One of the pivotal points to this manuscript is that dissolved Li might become a toxicity concern, so the hydrochemical understanding is important to a global urban population. I am not convinced of that being a driving force enough to make the work of the highest impact.

I think the data support the inferences the authors make in a general way. However, this is a far from airtight case. Many questions lay behind the small data set presented here, some which might be dispatched with some more thorough explanations, but others need more data before they can be confronted.

The manuscript uses population density and WW effluent in developing interpretations, which suggests a link between population and number of WWT facilities or volume of treated WW per unit population. That link is not mentioned in the text. Furthermore, although some waste Li would be “flushed” waste (and hence be part of municipal WW treatment), Li from battery or other solid waste would likely come from significantly from leakage from landfills. Distribution of these is also not mentioned in the text. Landfills are mentioned (line 116), but it is implied that water from landfills would be part of the WW treatment stream—unless Korean municipal water treatment differs from N. America, this is not likely to be so. Some description of what the water treatment protocols are would be helpful. How does water treatment for drinking water differ from that of wastewater (in most places these streams are separate)?

Although I think the study is one which, with some more data and clarification, is very valuable to a variety of audiences, I think that in its current form it poses too much speculation.

line 50: I wonder how much secular variation occurs in this system. Basically is one month's worth of data a reasonable sample from which we can expect lasting interpretations to come?

line 55: The data themselves are from ArcGIS? I should think the data were brought in from individual sources and the manipulations were done with ArcGIS (see also Table S1).

line 74: This is unclear: shales are typically among the most Li-rich rocks.

line 78: replace “formations” with “formation”

line 105: replace “starts to” with “approaches”

line 140, 147: replace “anthropic” with “anthropogenic”

Fig. 2: What is the difference between large and small symbols?

1 **Reply letter to the Reviewers' comments:**

2  
3 Reviewer #1 (Remarks to the Author):

4  
5 Choi and co-workers present a study on Li concentration and isotopic composition in the larger  
6 Seoul watershed. They document rather interesting trends: Li concentrations increase as the Han  
7 River crosses Seoul and Li isotopic composition becomes enriched in the lighter isotopes. The  
8 authors identify waste water treatment plants as likely sources, and show that Li isotopes in  
9 technological Li applications, i.e. batteries, correspond to the anthropogenic Li isotope end-  
10 member.

11  
12 The study is rather elegant in its simplicity, and pertinent in terms of the environmental  
13 awareness that it raises. Results are not overstated, the methods are detailed and of high quality.  
14 Since I am not an expert on lithium, I have spent an hour or so on the web of science to see what  
15 studies exist on Li pollution. I confirm the author's statements in the introduction, which is 'not  
16 much'. This would be the first environmental application of Li pollution tracing using Li  
17 isotopes. I therefore think it would of interest to the broader environmental chemistry and  
18 biogeochemistry community. And I therefore recommend publication in Nature Communications.

19  
20 Jeroen Sonke, Toulouse, May 2019

21  
22 We thank this reviewer for his positive review about our manuscript as it is indeed the first  
23 investigation demonstrating that Li levels and Li isotopes in river waters can be significantly  
24 impacted by anthropogenic inputs. Please see our response to his minor comments just below.

25  
26 **Minor comments:**

27  
28 L17 "Our study therefore unravels the need to perform a lithium survey..."  
29 One can unravel some complex problem....but not a need. Suggest to write 'Our study highlights  
30 the need for a lithium survey at the global scale...'

31  
32 **Response:** We agree and revised the text as commented.

33  
34 **Action:** On lines 9 – 11, we revised the text to read: "Our study therefore highlights the need for  
35 a global Li survey...".

36  
37 L29 and 34. 'Few studies have been published....toxic', and 'Li isotopes are widely used by  
38 earth scientist...'

39 Few vs widely....each phrase has 5 citations. Suggest to delete 'widely'.  
40

41 **Response/Action:** We have added some references to the text but please note that we are limited  
42 in reference number. Also, on line 29, we deleted 'widely'.  
43

44 L39. « Determining the conditions under which its concentration or its isotope signature can be

45 artificially biased becomes a challenge. »

46 What is meant by artificially biased? Anthropogenically impacted?

47

48 **Response/Action:** On lines 34 – 36, we corrected this in the text as follows: “However,  
49 determining the conditions under which Li concentration or its isotope signature can be impacted  
50 by anthropogenic activities remains a challenge.”

51

52 Not clear in Fig 2 caption what the smaller, half-transparent green and blue circles represent?

53

54 **Response/Action:** We added what they represent in the revised Figure caption and in its legend.

55

56 L91. “...Li isotope compositions are high and constant...”

57 It is not the isotope composition that is high....it is the the  $d7Li$  parameter (or  $7/6Li$  ratio) that is  
58 high.

59

60 **Response/Action:** On line 84, we replaced ‘the Li isotope compositions’ with ‘the  $\delta^7Li$  values’

61

62 If space permits I would suggest to move Figure 1 to the main text. It is very convincing in terms  
63 of binary mixing.

64

65 **Response/Action:** We agree with the reviewer suggestion and have added this figure to the main  
66 text (Figure 4).

67

68 Reviewer #2 (Remarks to the Author):

69

70 The aim of this manuscript is to study and quantify the amount of Li in the Han River basin  
71 (Korea) that is sourced from industrial anthropogenic activities. The production and usage of Li  
72 has significantly increased over the past two decades owing to both the electronic revolution and  
73 energy transition. Despite recognition of this, few studies have investigated the source and fate of  
74 anthropogenic-derived lithium in urban environments. In this study, the authors have combined  
75 Li concentration and isotope measurements in river water, tap water and wastewater treatment  
76 plant samples with geographical and geological information. They found that the concentration  
77 of Li in the Han River increases by a factor of 6 when crossing the city of Seoul, and this  
78 increase is accompanied with a decrease of the dissolved Li isotope composition. Because the Li-  
79 batteries have low Li isotope composition and the Li concentration and isotope composition of  
80 river samples is correlated with the population density, they suggest that “anthropogenic  
81 activities related to the number of inhabitants are responsible for the changes displayed by the  
82 Han River” (lines 98-99), through the disposal of Li-batteries.

83 I think that the purpose of this study is novel, timely and of interest to a wide range of people and  
84 scientific communities. The dataset coverage is good and the observed trends are quite  
85 spectacular. Clearly, as justified by the authors, there is a major input of anthropogenic Li into  
86 the Han River when it crosses the city of Seoul and this has major implications for environmental  
87 policies. However, I find that some aspects of the discussion about the origin, characterization  
88 and control of this anthropogenic source(s) of Li are problematic and not very clear. For this  
89 reason, I suggest that this manuscript could be considered for publication in Nature  
90 communication providing major revisions are carried out. Below, I detail my main criticisms of

91 the manuscript.

92

93 We thank the reviewer for his/her positive comments.

94

95 The authors suggest that the high Li content is related to the high population density (title of the  
96 paper, Lines 98-99, correlation with population density Fig. 4) through the release of Li from Li-  
97 batteries due to the absence of disposal process guidelines for waste batteries (Line 111), but they  
98 do not provide or explicitly discuss a causal mechanism. How is the Li transferred from the  
99 battery into the river? (this is not discussed at all in the manuscript). Why would the population  
100 density control the Li release? Is it because of widespread disposal of used Li-batteries by  
101 inhabitants? (i.e. each inhabitant has electronics with Li-battery so the more inhabitants, the more  
102 disposal of used batteries, the more contamination of the water due to the leaking of disposed Li  
103 batteries?). The authors need to discuss or clarify these aspects.

104

105 **Response:** It is true that we were not presenting clearly in the manuscript the direct link that  
106 exists between battery or other Li-rich materials, wastewaters, river and tap waters. This is now  
107 done, as explained below in three parts:

108

109 A. We have added two key schematic diagrams explaining clearly how wastewaters are  
110 related to the Han River, and how the Han River is related to tap waters (after corresponding  
111 treatments) in the Supplementary Information. Note that there is only one landfill site (the  
112 Sudokwon Landfill) in the Seoul locality, at 35 km west of Seoul (now shown in Fig. 1).  
113 Therefore, the leachate from this landfill does not affect significantly our river samples.

114

115 **Action:** This is now made clearer in the text, in the revised Fig. 1 and in the Supplementary  
116 Information.

117

118 B. The Korea Ministry of Environment promulgated the extended producer  
119 responsibility (EPR) regulation for a number of electrical and electronic products in 2003 so that  
120 66% of primary lithium batteries were recycled in 2015 (<http://www.kbra.net/epr/epr5.htm>).  
121 However, secondary Li-ion battery (LIB) has not been included in the EPR list so that the  
122 volume of LIB collected and recycled through the EPR system is small. LIBs are commonly used  
123 in mobile phones (44%), laptop computers (27%) and table PCs (6%), and the waste of those  
124 electronics can act as anthropogenic source of lithium. In 2015, total population of mobile phone  
125 subscribers was more than 43 million, i.e. 84% of total population in South Korea (the Korea  
126 Ministry of Science and ICT; <http://www.itstat.go.kr>). The sales volume of mobile phones is 15  
127 million units every year and the estimated volume of obsolete mobile phones accounts for about  
128 80% of the sale volume (Lee et al., 2007). Only about 4 million units of waste mobile phones  
129 (=1%) were collected by Korean telecommunication industries and were either exported (2  
130 million units) or treated and recycled (Song, 2004; Lee, 2006). Therefore, these numbers  
131 demonstrate the large number of LIB not being recycled and that the more inhabitants, the more  
132 disposal of used LIBs.

133

134 **Action:** We added, some of the quantification concerning the use of LIB in the text on lines 129  
135 – 132, and the new data in Tables S3 & S5.

136

137 C. In the first version of the manuscript, we explored only the Li Battery because of their  
138 very high Li content. However, as we were also highlighting, Li may also come from other types  
139 of Li-rich materials: therapeutic drugs, compost, and detergent. Since then, we have analyzed Li  
140 concentrations and its isotope compositions for these products too. Therapeutic drugs used for  
141 bipolar disorder (Li carbonate) display high Li content as expected ( $10.5 \pm 0.6$  wt.%,  $1\sigma$ ,  $n=2$ ),  
142 but also low  $\delta^7\text{Li}$  value ( $12.8 \pm 0.8\%$ ,  $1\sigma$ ,  $n=2$ ). Also, the compost and two wastewater samples  
143 coming from food waste treatment plant contain high Li levels ( $55.8 \mu\text{M}$  and  $2.90 \pm 0.45 \mu\text{M}$ ,  
144 respectively) and more variable  $\delta^7\text{Li}$  values ( $9.3\%$  and  $19.4 \pm 1.5\%$ , respectively). Several  
145 detergents commonly used in South Korea display high Li contents ( $224 \pm 144 \mu\text{M}$ ,  $1\sigma$ ,  $n=4$ ) and  
146 also slightly higher  $\delta^7\text{Li}$  values on average ( $15.4 \pm 6.0\%$ ,  $1\sigma$ ,  $n=4$ ).

147  
148 Overall, the  $\delta^7\text{Li}$  values of the most enriched materials (typically  $> 5$  ppm Li dry weight; see  
149 revised Table S5) that may contribute to the WWTP composition are low ( $\delta^7\text{Li} < 13\%$ ). These  
150 new investigations strongly support that the high Li levels of wastewaters can be explained by  
151 the release from these materials, and that the negative correlation observed in Fig. 4 is best  
152 explained by a strong input from these anthropogenic materials. This also very consistent with  
153 the positive trend with population density (Figs. 1 & S3).

154  
155 **Action:** We revised the manuscript accordingly, and added these new data to the text, Table S5,  
156 and Figs. 4 & S3.

157  
158 Secondly, similarly to Li, the concentrations of most of the major anions and cations are  
159 significantly increasing downstream. What processes or input sources are responsible for this  
160 concentration increase? Since these elements are not present (or in very low amounts) in Li  
161 batteries, it shows that there are possibly other sources of dissolved ions to the river.  
162 Could these sources potentially account for some of the observed increase Li concentration? It is  
163 possible to partly answer this question by normalizing the Li concentrations (e.g. to Cl or Na).  
164 When Li concentrations are normalized, it appears that only the wastewater effluent “TAW” (and  
165 not the others effluents) is a significant source of Li relative to other elements and relative to the  
166 upstream non-impacted tributaries. Clearly, there is a specific local source of Li only in that part  
167 of the city (corresponding to TAW), and this input explains most of the observed Li  
168 concentration increase downstream. This lead to my third criticism of the discussion: I find the  
169 correlation between the Li concentration and the population density (Fig. 4a) misleading. The  
170 highest Li concentration (by far) and Li/Cl (or Li/Na) ratio do not correspond to the area with the  
171 highest population density (WWTP effluent “TAW”, Fig. 4). The anthropogenic input of Li to the  
172 river is local and not widespread, and does not correspond to the zone of highest population  
173 density. In my opinion, this contradicts the title of the manuscript, and gives some indications  
174 about the source of this anthropogenic Li. Is there something specific in this area relative to other  
175 areas of the city that could potentially explain the observed high Li content? I understand that it  
176 is beyond the scope of this study to precisely characterize all the potential source of  
177 anthropogenic Li in urban environments, and the authors mention several possible sources of Li.  
178 Nevertheless, I think that data interpretation could be expanded with the above suggestions.

179  
180 **Response:** We now report new data for other potential sources of Li to the wastewaters. Results  
181 are shown in the revised Table S5 and in Figs. 4 & S3, and highlight two key points. First, some  
182 of these materials can be enriched in major elements, such as Na or Ca (for detergents and

183 compost), but given the large amounts of these elements already present in the water, this may  
184 not represent a significant impact, although it would deserve to be quantified more precisely. It is  
185 a difficult to quantify precisely the contribution of the anthropogenic pollution to the Han River  
186 by using Li/Cl or Li/Na since the Wastewaters display large variations, due principally to the  
187 regulating use of Cl and Na for water chlorination (see new Fig. S2). The second point is that,  
188 materials with the highest Li concentrations are isotopically light (typically  $\delta^7\text{Li} < 13\text{‰}$ ; revised  
189 Table S5), and this is consistent with the Wastewaters endmember shown in Figs. 4 & S3 since  
190 all of them are significantly enriched in Li (650 nM on average) compared to the Han River  
191 downstream ( $< 82$  nM), and display lower  $\delta^7\text{Li}$  values as well.

192  
193 As the reviewer pointed out, the highest Li concentration and Li/Na ratio do not directly  
194 correspond to the WWTP with the highest population density (noted “JNW” in Fig. S3). This  
195 distinct feature of the “TAW” WWTP compared to the others may be due to the food waste  
196 treatment plant that exists only in its drainage area (Fig. 1B), as we have shown that its released  
197 wastewater contains high Li content ( $2.90 \pm 0.45$   $\mu\text{M}$ ,  $1\sigma$ ,  $n=2$ ; revised Table S5). The discharge  
198 rate of TAW is lower than that of JNW having the highest population density, which explains the  
199 discrepancy with the population density observed for this sample (Table S3; Fig. S4).

200  
201 **Action:** We added these new data and revised the main text and Supplementary Information by  
202 adding WWTP discharge rate and Li/Na ratios in Fig. S4.

203  
204 As a final general comment, Seoul is close to the estuary, could the tide have an influence on the  
205 river chemistry?

206  
207 **Response:** We thank the reviewer for this comment and we would like to point out that we had  
208 initially explored this possibility. However, we think that we have two solid arguments against  
209 this effect: first, seawater does not explain the Li enrichment and  $\delta^7\text{Li}$  decrease observed in the  
210 HR water because its  $\delta^7\text{Li}$  value is high ( $31.2 \pm 0.2\text{‰}$ ; Millot et al., 2004; see revised Fig. 4).  
211 Second, it has been previously reported that the seawater intrusion does not occur in coastal  
212 aquifers for the western coastal area of South Korea, which is about 4 km from the coastline (e.g.,  
213 Park et al., 2005). Our river sampling site the closest to the estuary (HR4) is located at  $\sim 30$  km  
214 distance from the coastline.

215  
216 **Action:** We added this in Fig. 1 and plotted the seawater value in the revised Fig. 4.

217  
218 Below are more specific comments:

219  
220 - Line 1: the title is problematic as the highest source of Li is not where the population density is  
221 the highest

222  
223 **Response:** We understand the reviewer’s comment but as we address in previous responses  
224 above, high Li content and low  $\delta^7\text{Li}$  value are closely related to population density (Fig. 2).

225  
226 - Lines 57-59: what is the “drainage” area covered by these wastewater treatment plants and how  
227 is the population density calculated for these samples (Fig. 4).

228



229 **Response:** Based on the information on the drainage area covered by each WWTP and  
230 population from the Ministry of Environment (<http://www.me.go.kr>), we calculated the  
231 population density as dividing population by the drainage area.

232  
233 **Action:** We added the drainage area, population and population density in the revised Table S3.

234  
235 - Line 136: I think Figure S1 should be in the main text instead of Figure 3.

236  
237 **Action:** As it was also advised by the Reviewer #1, we moved Figure S1 to the main manuscript  
238 (Fig. 4).

239  
240 **References:**

- 241 1. Lee, J.-c., Song, H.T., Yoo, J.-M. Present status of the recycling of waste electrical and  
242 electronic equipment in Korea. *Resour. Conserv. Recy.* **50**, 380-397 (2007).
- 243 2. Song, H.T. Current status of the recycling of waste mobile phones and urgent problem. *e-*  
244 *Recycling* **8**, 7-9 (2004) (in Korean).
- 245 3. Lee, J.-c. Private communication with SK networks, <http://www.sknetworks.co.kr>. (2006).
- 246 4. Millot, R., Guerrot, C., Vigier, N. Accurate and high-precision measurement of lithium  
247 isotopes in two reference materials by MC-ICP-MS. *Geostand. Geoanal. Res.* **28**, 153-159  
248 (2004).
- 249 5. Park, S.-C. *et. al.* Regional hydrochemical study on salinization of coastal aquifers, western  
250 coastal area of South Korea. *J. Hydrol.* **313**, 182-194 (2005).

251  
252 Reviewer #3 (Remarks to the Author):

253  
254 The manuscript presents concentration and isotope ratio data for Li from surface, waste, and tap  
255 water from around a major city. The goal is to begin to understand the scope of Li contamination  
256 in municipal waters. Lithium is an element frequently not quantified in surface and drinking  
257 waters, so there is something of a gap in our knowledge of the baseline of Li in these waters.  
258 I think the idea is an interesting one and one which merits investigation by the geochemical  
259 community. From that standpoint, I think the manuscript has a certain value to a Nature audience.

260  
261 Although the health impacts of dissolved Li are far from clear, most studies do not signal  
262 immense concern for Li toxicity in general. One of the pivotal points to this manuscript is that  
263 dissolved Li might become a toxicity concern, so the hydrochemical understanding is important  
264 to a global urban population. I am not convinced of that being a driving force enough to make  
265 the work of the highest impact.

266  
267 **Response:** As underlined by the reviewer, there is a gap in our knowledge concerning the  
268 baseline of Li in the environment, in particular in municipal waters, small and large rivers  
269 draining cultivated regions, and in plants and animals. Thus far, in the literature there is not an  
270 immense concern (although not negligible) for Li toxicity, and we think that our study  
271 demonstrates that this must change in the future.

272  
273 As summarized in our manuscript, high Li levels can be related either to positive aspects (less  
274 suicides and for treating bipolarity), or to toxic and deleterious consequence (during pregnancy).

275 Several studies have advised Li to be considered as an essential element due to its biological role  
276 but others have highlighted its high toxicity for aquatic species. In nature, Earth scientists have  
277 neglected these aspects because of few measurements in plants that show low Li levels. However,  
278 the number of data in organic samples is still scarce (except in marine fossils).

279  
280 In geochemistry, Li isotopes are perhaps the most promising proxy unraveling why and how  
281 global climate has been regulated by continental weathering over geological timescales. Recently,  
282 large scale studies of continental weathering are based on river sampling performed in highly  
283 populated areas (in Asia in particular).

284  
285 For all these reasons, and given the increasing importance of this element in modern life, we  
286 think that our study is of importance and of interest for different research fields (ecotoxicology,  
287 geochemistry, climate, weathering, health & environment and water quality).

288  
289 **Action:** On lines 20 – 32, we revised the text to better highlight these points.

290  
291 I think the data support the inferences the authors make in a general way. However, this is a far  
292 from airtight case. Many questions lay behind the small data set presented here, some which  
293 might be dispatched with some more thorough explanations, but others need more data before  
294 they can be confronted.

295  
296 **Response/Action:** Please see our detailed response to Reviewer #2. In brief, we conducted  
297 additional field works in order to collect samples representing different potential Li-rich  
298 anthropogenic sources, and measured their Li contents and isotope compositions. Results show  
299 that Li contents of all sampled anthropogenic sources are much higher than that of river water,  
300 and their  $\delta^7\text{Li}$  values are low ( $< 13\text{‰}$ ), strongly supporting the impact of these sources on  
301 WWTPs, Han River, as well as tap waters (see revised Table S5, and Figs. S3 & 4).

302  
303 The manuscript uses population density and WW effluent in developing interpretations, which  
304 suggests a link between population and number of WWT facilities or volume of treated WW per  
305 unit population. That link is not mentioned in the text.

306  
307 **Action:** On line 112 – 113, we were mentioning a link between population and volume of treated  
308 WW per unit population but we have further explored this idea, as detailed in our response to the  
309 Reviewer #2. Please see also the new Fig. S4 in the Supplementary Information.

310  
311 Furthermore, although some waste Li would be “flushed” waste (and hence be part of municipal  
312 WW treatment), Li from battery or other solid waste would likely come from significantly from  
313 leakage from landfills. Distribution of these is also not mentioned in the text. Landfills are  
314 mentioned (line 116), but it is implied that water from landfills would be part of the WW  
315 treatment stream—unless Korean municipal water treatment differs from N. America, this is not  
316 likely to be so. Some description of what the water treatment protocols are would be helpful.  
317 How does water treatment for drinking water differ from that of wastewater (in most places these  
318 streams are separate)?

319

320 **Response:** The new version of the manuscript details all the required information concerning the  
321 water treatment protocols, landfill, and relationship between the river, the tap water and waste  
322 waters. Only one landfill site (the Sudokwon Landfill) exists in the Seoul locality, at 35 km west  
323 of Seoul. The leachate from this landfill therefore does not affect our river samples. Wastewaters  
324 coming from the various treatment plants shown in Fig. 1 are more likely to impact the Han river  
325 in Seoul and this is confirmed by the mixing diagram using isotopes shown in Fig. 4. We added 2  
326 schematic diagrams showing the treatment protocols submitted by wastewaters and tap waters,  
327 and their relationship with the river. Please see the new Figs. S1 & S2 in the Supplementary  
328 Information.

329  
330 *Although I think the study is one which, with some more data and clarification, is very valuable*  
331 *to a variety of audiences, I think that in its current form it poses too much speculation.*

332  
333 **Action:** We have significantly reinforced our interpretation by adding new – and until now  
334 unexplored- isotope data of various Li-rich materials (see revised Table S5). We also provide  
335 discharge rate from the various WWTP that explains well the regional variation too (see new Fig.  
336 S4). We revised the text, Figures, Tables and the Supplementary Information. we believe the  
337 revised manuscript is improved and our interpretation is strengthened.

338  
339 *line 50: I wonder how much secular variation occurs in this system. Basically is one month's*  
340 *worth of data a reasonable sample from which we can expect lasting interpretations to come?*

341  
342 **Response:** Numerous publications, including those published in Nature, have used a case study  
343 in order to unravel a key control. Also, global riverine solute fluxes to the ocean are upscaled  
344 from data representing less than 30% of the total discharge to the ocean and about ~50% of  
345 Earth's exorheic continental area. By choosing the highly populated metropolitan city of Seoul  
346 (South Korea) and the Han River Basin, which carries small amounts of dissolved Li, and  
347 constant and homogeneous  $\delta^7\text{Li}$  values upstream, we are able to evidence the impact of  
348 anthropogenic activities on Li levels in waters. We also provide, for the first time, Li isotope  
349 compositions for several Li-rich materials including drugs batteries, detergent and compost.  
350 Future studies of seasonal variations will certainly be of interest and will have to take our results  
351 into account. In this sense, we think that our case study of the largest basin in South Korea is  
352 pertinent.

353  
354 *line 55: The data themselves are from ArcGIS? I should think the data were brought in from*  
355 *individual sources and the manipulations were done with ArcGIS (see also Table S1).*

356  
357 **Response:** The reviewer is correct.

358  
359 **Action:** We addressed individual sources in the footnote of revised Table S1 as follows:  
360 “<sup>a</sup> The manipulations were done with ArcGIS 10 (Esri, Redlands, CA, USA). <sup>b</sup> Land use data  
361 from Environmental geographic information service, EGIS (<https://egis.me.go.kr>). <sup>c</sup> Population  
362 data from biz-gis ([www.biz-gis.com](http://www.biz-gis.com)).”

363  
364 *line 74: This is unclear: shales are typically among the most Li-rich rocks.*

365

366 **Response:** We agree with the reviewer and noticed it is a typo.

367

368 **Action:** On line 67 – 68, we revised the text to read: “..., perhaps due to the occurrence of Li-  
369 rich shales.”

370

371 **line 78:** replace “formations” with “formation”

372

373 **Response:** We thank the reviewer’s comment.

374

375 **Action:** On line 71, we changed to “formation”.

376

377 **line 105:** replace “starts to” with “approaches”

378

379 **Response:** We thank the reviewer’s comment.

380

381 **Action:** On line 112, we changed to “approaches”.

382

383 **line 140, 147:** replace “anthropic” with “anthropogenic”

384

385 **Response/Action:** We replaced all through the text.

386

387 **Fig. 2:** What is the difference between large and small symbols?

388

389 **Response:** We used large and small symbols to distinguish main river channel from each  
390 tributary. Now we revised Fig. 2 in order to avoid the confusion.

391

392 **Action:** We added the caption as follows: “Half-transparent circles represent the tributary of each  
393 river.”

Reviewers' comments:

Reviewer #1 (Remarks to the Author):

I have examined the revised MS and rebuttal by Choi et al. The study provides strong evidence that enhanced urban river Li levels are supplied by waste water treatment plants (WWTP). The reviewers raise an interesting debate on whether the Li in WWTP is due to Li ion battery waste or due to other sources such as Li-medication, and whether population density is the dominant control factor.

The authors now provide additional evidence on the Li isotope composition of Li-medication, detergents and compost, supporting these compounds as potential Li sources to WWTP. The authors include these sources now in their conclusions, and abstract.

Regarding population density, I agree with the previous reviewers that a more important control factor may be the particular Li sources that supply waste water to WWTP. Argument as to why old, stored, and waste Li batteries would deteriorate on a timescale of decades are lacking. Given the high level of Li in medication, it may well be that WWTP Li levels are not governed by population density but by # of medicated people. This merits further investigation, but seems beyond the scope of this study, unless an efficient proxy for Li-medication use can be retrieved for Seoul. I therefore concur with the reviewers that it may be better to change the title to 'Impact of WWTP on Li content in river and tap water'.

All that said, I feel that the revised version of the MS is as strong as it can get. These are fascinating findings that will likely generate a broad interest. Once more I strongly recommend publication in NCOMMS.

Reviewer #2 (Remarks to the Author):

In general, the authors have considered reviewers comments and improved the manuscript. In particular, the new measurements on other types of anthropogenic inputs is a valuable addition. However, I still have a major concern about the correlation between population density and Li concentrations/isotopes and about the title of this manuscript "Impact of high population density on lithium content in river and tap water" which in my opinion is misleading. Put simply, correlation does not imply causation. What this study shows is that high Li content is not due to the number of people per se, but to the large Li input from lithium battery / therapeutic drug / food waste (possibly proportional to the population) combined with the inefficiency of wastewater treatment for Li-removal. 30 years ago, the population density in Seoul was also very high but there was no usage of Li-batteries (and maybe no Li-rich therapeutic drugs as well?) so the Li content in waste water and in the Han River was probably far lower than today. This example shows that high-population density is not (directly) the cause for high Li content in urban waters. The present-day high Li content in the Han river has more to do with industrial processes and urban policy instead of population density. In my opinion, the title needs to be changed to something like "Impacts of anthropogenic inputs on the lithium content of river and tap water in high-density population urban areas".

Apart from changing the title, my recommendation is that this manuscript can be published in Nature communication with only minor revision. See below some additional minor comments:

- Line 29: "Earth" scientists
- Line 64: replace "depleted with respect" by "lower relative to".
- Line 68: remove "in parallel"
- Line 90: remove "intimate"
- Line 91: Please see my comment above, there is not direct relation between Li and the number of people. I would reword "related to the number of inhabitants" to "related to increasing urban activities".
- Line 92: remove "at first". You already wrote in lines 53 to 55 that you collected and analyzed

influent and effluent wastewaters, you don't need to repeat this information here.

- Line 96: remove "are"

- Line 99: I have no idea what this sentence means, this needs to be re-written.

- Line 108-110: replace by "The relationship between Li isotope and concentration can be explained by release of isotopically light Li..."

- Line 124: replace "Combined all together" by "Altogether"

Line 154-156: this sentence needs to be re-written. You could say something like "in urban areas, Li isotopes are likely more sensitive to anthropogenic inputs rather than local weathering inputs".

Reviewer #3 (Remarks to the Author):

Review of Nature Communications manuscript by H-B Choi et al., "Impact of high population density on lithium content in river and tap water" (revised)

Review by Paul Tomascak, SUNY Oswego, 9/18/19

The authors have done a responsible job responding to the comments from my previous review, as well as those of the other reviewers and I agree with the conclusion that the increased river Li represents anthropogenic influence. I especially appreciate the incorporation of valuable new data on other potential anthropogenic pollutants—something the community has needed more of for a long time. Nevertheless I am still left with a disconnect over the cause and effect relationship suggested between population and Li in water if batteries are the primary anthropogenic Li source. My specific concerns map to place in the text noted below.

line 3: Sentences should not begin with abbreviations (spell out lithium). This should be checked throughout.

line 4: "their impacts"? The impacts of living organisms on Li levels?

line 22: "several species and human beings"? Several species of mammals?

line 37: "these effects" is ambiguous here.

line 56: delete "its"

line 57: L-SVEC, the original title, is now officially NIST RM 8545.

line 80: Why would a water regulation system (a dam) fractionate stable isotope?

line 92: Why on Fig. 3 are only five of six WWTP plants are represented?

line 117: Is water discharge rate ever quantified?

line 119-128: The manuscript also seems to confuse the point about tap water. If river water is the primary source for tap water then chemical similarity between the two is expected, and so this does not seem to need more than a sentence of coverage (not a paragraph).

line 129: More people means more cell phones. More cell phones means more cell phones being trashed. But where do those go? If they are not being sent to the landfill (unrelated to the wastewater in this study) then what? Some proportion that is not disposed of is probably accumulating in peoples' homes, but the manuscript seems to equate phones no longer in use that don't get put in the trash to some kind of instant environmental reactivity. Are people throwing used phones into the streets? I just can't connect the dots here.

Fig. 1: The key for coloring is population, though I presume this is people/km<sup>2</sup>.

## 1 **Responses to the Reviewers' comments:**

### 3 Reviewer #1 (Remarks to the Author):

5 I have examined the revised MS and rebuttal by Choi et al. The study provides strong evidence  
6 that enhanced urban river Li levels are supplied by waste water treatment plants (WWTP). The  
7 reviewers raise an interesting debate on whether the Li in WWTP is due to Li ion battery waste  
8 or due to other sources such Li-medication, and whether population density is the dominant  
9 control factor.

10 The authors now provide additional evidence on the Li isotope composition of Li-medication,  
11 detergents and compost, supporting these compounds as potential Li sources to WWTP. The  
12 authors include these sources now in their conclusions, and abstract.

13 Regarding population density, I agree with the previous reviewers that a more important control  
14 factor may be the particular Li sources that supply waste water to WWTP. Argument as to why  
15 old, stored, and waste Li batteries would deteriorate on a timescale of decades are lacking. Given  
16 the high level of Li in medication, it may well be that WWTP Li levels are not governed by  
17 population density but by # of medicated people. This merits further investigation, but seems  
18 beyond the scope of this study, unless an efficient proxy for Li-medication use can be retrieved  
19 for Seoul. I therefore concur with the reviewers that it may be better to change the title to  
20 'Impact of WWTP on Li content in river and tap water'.

21 All that said, I feel that the revised version of the MS is as strong as it can get. These are  
22 fascinating findings that will likely generate a broad interest. Once more I strongly recommend  
23 publication in NCOMMS.

25 **Response:** We thank the reviewer for his positive review and agree with his suggestion.

27 **Action:** Following the reviewer's suggestion as well as the one from the reviewer #2, we  
28 changed the title as 'Anthropogenic lithium in river and tap water of high-density population  
29 urban areas'.

### 31 Reviewer #2 (Remarks to the Author):

33 In general, the authors have considered reviewers comments and improved the manuscript. In  
34 particular, the new measurements on other types of anthropogenic inputs is a valuable addition.  
35 However, I still have a major concern about the correlation between population density and Li  
36 concentrations/isotopes and about the title of this manuscript "Impact of high population density  
37 on lithium content in river and tap water" which in my opinion is misleading. Put simply,  
38 correlation does not imply causation. What this study shows is that high Li content is not due to  
39 the number of people per se, but to the large Li input from lithium battery / therapeutic drug /  
40 food waste (possibly proportional to the population) combined with the inefficiency of  
41 wastewater treatment for Li-removal. 30 years ago, the population density in Seoul was also very  
42 high but there was no usage of Li-batteries (and maybe no Li-rich therapeutic drugs as well?) so  
43 the Li content in waste water and in the Han River was probably far lower than today. This  
44 example shows that high-population density is not (directly) the cause for high Li content in  
45 urban waters. The present-day high Li content in the Han river has more to do with industrial

46 processes and urban policy instead of population density. In my opinion, the title needs to be  
47 changed to something like “Impacts of anthropogenic inputs on the lithium content of river and  
48 tap water in high-density population urban areas”.

49  
50

51 **Response and Action:** As replied to the reviewer #1, we changed the title as ‘Anthropogenic  
52 lithium in river and tap water of high-density population urban areas’. On lines 149 – 151, we  
53 also clarified in the text this precision that “Overall, our study shows that the large Li inputs  
54 observed in the Han River come from LIB, therapeutic drug, and food waste, all likely  
55 proportional to the population, combined with the inefficiency of wastewater treatment for Li-  
56 removal.”

57

58 Apart from changing the title, my recommendation is that this manuscript can be published in  
59 Nature communication with only minor revision. See below some additional minor comments:

60

61 - Line 29: “Earth” scientists

62

63 **Response/Action:** We changed to ‘Earth’.

64

65 - Line 64: replace “depleted with respect” by “lower relative to”.

66

67 **Response/Action:** We replaced it with ‘lower relative to’.

68

69 - Line 68: remove “in parallel”

70

71 **Response/Action:** We removed it.

72

73 - Line 90: remove “intimate”

74

75 **Response/Action:** We removed it.

76

77 - Line 91: Please see my comment above, there is not direct relation between Li and the number  
78 of people. I would reword “related to the number of inhabitants” to “related to increasing urban  
79 activities”.

80

81 **Response/Action:** We do not understand the difference with our statement that “anthropogenic  
82 activities related to the number of inhabitants are responsible for the changes displayed by the  
83 HR”. Thus, we prefer to leave it as it is.

84

85 - Line 92: remove “at first”. You already wrote in lines 53 to 55 that you collected and analyzed  
86 influent and effluent wastewaters, you don’t need to repeat this information here.

87

88 **Response/Action:** We agree with the reviewer and removed the sentences on lines 93 – 95.

89

90 - Line 96: remove “are”

91



92 **Response/Action:** We removed it.

93

94 - Line 99: I have no idea what this sentence means, this needs to be re-written.

95

96 **Response/Action:** We clarified this sentence by revising the text to read: “Thus, any component  
97 enriched in wastewaters can affect both the Han River and tap waters”.

98

99 - Line 108-110: replace by “The relationship between Li isotope and concentration can be  
100 explained by release of isotopically light Li...”

101

102 **Response/Action:** We revised the text to read: “the relationship between Li concentration and its  
103 isotopes can be explained by release of isotopically light Li from WWTP.”

104

105 - Line 124: replace “Combined all together” by “Altogether”

106

107 **Response/Action:** We replaced it with ‘Altogether’.

108

109 Line 154-156: this sentence needs to be re-written. You could say something like “in urban areas,  
110 Li isotopes are likely more sensitive to anthropogenic inputs rather than local weathering inputs”.

111

112 **Response/Action:** We revised the text to read: “Finally, this study highlights that in urban areas,  
113 Li isotopes are more sensitive to anthropogenic inputs rather than local weathering inputs and  
114 therefore should be used with caution as a weathering proxy”.

115

116 Reviewer #3 (Remarks to the Author):

117

118 Review of Nature Communications manuscript by H-B Choi et al., “Impact of high population  
119 density on lithium content in river and tap water” (revised)

120

121 Review by Paul Tomascak, SUNY Oswego, 9/18/19

122

123 The authors have done a responsible job responding to the comments from my previous review,  
124 as well as those of the other reviewers and I agree with the conclusion that the increased river Li  
125 represents anthropogenic influence. I especially appreciate the incorporation of valuable new  
126 data on other potential anthropogenic pollutants—something the community has needed more of  
127 for a long time. Nevertheless I am still left with a disconnect over the cause and effect  
128 relationship suggested between population and Li in water if batteries are the primary  
129 anthropogenic Li source. My specific concerns map to place in the text noted below.

130

131 line 3: Sentences should not begin with abbreviations (spell out lithium). This should be checked  
132 throughout.

133

134 **Response/Action:** We check it thorough the text and corrected.

135

136 line 4: “their impacts”? The impacts of living organisms on Li levels?

137

138 **Response/Action:** We revised the text to read: “the impacts of anthropogenic inputs on Li levels  
139 in the environment”.

140  
141 [line 22: “several species and human beings”? Several species of mammals?](#)

142  
143 **Response/Action:** We replaced ‘species’ with ‘organisms’.

144  
145 [line 37: “these effects” is ambiguous here.](#)

146  
147 **Response/Action:** We revised the text to read: “the effects of anthropogenic activities”.

148  
149 [line 56: delete “its”](#)

150  
151 **Response/Action:** We removed it.

152  
153 [line 57: L-SVEC, the original title, is now officially NIST RM 8545.](#)

154  
155 **Response/Action:** We replaced it with ‘NIST RM 8545’.

156  
157 [line 80: Why would a water regulation system \(a dam\) fractionate stable isotope?](#)

158  
159 **Response/Action:** A water regulation system (a dam) disturbs the natural sediment systems,  
160 making sediments retained in the reservoir. It allows longer water-sediment interaction or deeper  
161 riverbed erosion, causing potentially Li isotope variations (see Yang et al. JGR Earth surface,  
162 accepted, <https://doi.org/10.1029/2019JF005078>).

163  
164 [line 92: Why on Fig. 3 are only five of six WWTP plants are represented?](#)

165  
166 **Response/Action:** Unfortunately, we could not collect the wastewater influent ‘GPW’ so that  
167 there are only 5 WWTP data in Fig. 3.

168  
169 [line 117: Is water discharge rate ever quantified?](#)

170  
171 **Response/Action:** We used the data from the Ministry of Environment, Republic of Korea.

172  
173 [line 119-128: The manuscript also seems to confuse the point about tap water. If river water is  
174 the primary source for tap water then chemical similarity between the two is expected, and so  
175 this does not seem to need more than a sentence of coverage \(not a paragraph\).](#)

176  
177 **Response/Action:** We understand the reviewer’s point but, as mentioned on lines 99 – 101,  
178 although river water is the primary source for tap water, it experiences rigorous purification  
179 processes before river water as tap water is provided to consumer households (Fig. S2).  
180 Therefore, although chemical and isotopic similarity between river water and tap water is  
181 expected, rigorous purification processes could differentiate their chemical and isotopic  
182 similarity. Because this study first demonstrates water treatment protocols are inefficient for Li,  
183 we believe this paragraph is necessary.

184  
185  
186  
187  
188  
189  
190  
191  
192  
193  
194  
195  
196  
197  
198  
199  
200  
201  
202  
203  
204  
205  
206  
207

line 129: More people means more cell phones. More cell phones means more cell phones being trashed. But where do those go? If they are not being sent to the landfill (unrelated to the wastewater in this study) then what? Some proportion that is not disposed of is probably accumulating in peoples' homes, but the manuscript seems to equate phones no longer in use that don't get put in the trash to some kind of instant environmental reactivity. Are people throwing used phones into the streets? I just can't connect the dots here.

**Response:** We understand the reviewer's point. As raised by the reviewer #1, "it is an interesting debate on whether the Li in WWTP is due to Li in ion battery waste or due to other sources such as Li-medication, detergent and food". Indeed, we now focus less on batteries in the text and propose various explanations to the high Li contents observed in the WWTP. Concerning the Li contribution from the cellular phone waste, we think three different ways since only 1% of them are recycled; 1) from illegal wastes within the agglomeration, 2) from incinerators since there are four incineration facilities in Seoul, and 3) from numerous local industrial sites where these batteries are constructed, transformed or used. We believe each of these possibilities would deserve to be explored and quantified, but this is beyond the scope of this study.

**Action:** On line 130, we replaced "mostly" with "would".

Fig. 1: The key for coloring is population, though I presume this is people/km<sup>2</sup>.

**Response/Action:** It is a typo. We revised Fig. 1b.

REVIEWERS' COMMENTS:

Reviewer #3 (Remarks to the Author):

I am sufficiently placated by the changes the authors have made in response to prior comments.  
There is still a measure of text editing that will be needed (e.g., improper pluralizations or their lack).

1 **Responses to the Reviewers' comments:**

2

3 Reviewer #3 (Remarks to the Author):

4

5 I am sufficiently placated by the changes the authors have made in response to prior comments.  
6 There is still a measure of text editing that will be needed (e.g., improper pluralizations or their  
7 lack).

8

9 **Response:** We thank the reviewer for his comments.

10

11 **Action:** Following the reviewer's comments, we double-checked and carefully revised the text.
